# Supplementary material for: Over a ten-year record of aerosol optical properties at SMEAR II
Source: Copernicus journal article supplement (doi:10.5194/acp-2018-981), 2018-11-12
Supplement: Supplementary file [file acp-2018-981-AC3-supplement.pdf]

# Over a ten-year record of aerosol optical properties at SMEAR II

Krista Luoma<sup>1</sup>, Aki Virkkula<sup>1,2</sup>, Pasi Aalto<sup>1</sup>, Tuukka Petäjä<sup>1</sup>, Markku Kulmala<sup>1</sup>

<sup>1</sup>Institute for Atmospheric and Earth System Research, University of Helsinki, Helsinki, 00014, Finland

<sup>2</sup>Finnish Meteorological Institute, Helsinki, 00560, Finland

5 *Correspondence to:* Krista Luoma (krista.q.luoma@helsinki.fi), Aki Virkkula (aki.virkkula@fmi.fi)

## S1. Data coverage

The data coverage for each month is presented in Table S1. The data coverage is presented separately for  $\sigma_{\text{sca}}$  and  $\sigma_{\text{abs}}$ . The Table S1 shows clearly how the data coverage improved from the beginning of the measurements to 2017. The data was quality assured by the author. Data was invalidated if the instrument had mechanical problems or if the RH in the instrument exceeded

10 40 %.

**Table S1. Data coverage of the extensive AOPs. The data coverage is presented as percentages for each month.**

| Data coverage (%) |                       | Jan | Feb | Mar | Apr | May | Jun | Jul | Aug | Sep | Oct | Nov | Dec |
|-------------------|-----------------------|-----|-----|-----|-----|-----|-----|-----|-----|-----|-----|-----|-----|
| <b>2006</b>       | $\sigma_{\text{sca}}$ | -   | -   | -   | -   | -   | 29  | 54  | 25  | 28  | 64  | 99  | 42  |
|                   | $\sigma_{\text{abs}}$ | -   | -   | -   | -   | -   | 27  | 52  | 25  | 27  | 64  | 100 | 43  |
| <b>2007</b>       | $\sigma_{\text{sca}}$ | 0   | 54  | 100 | 99  | 76  | 81  | 3   | 9   | 46  | 51  | 71  | 89  |
|                   | $\sigma_{\text{abs}}$ | 0   | 53  | 99  | 99  | 76  | 81  | 2   | 08  | 46  | 58  | 83  | 91  |
| <b>2008</b>       | $\sigma_{\text{sca}}$ | 100 | 99  | 100 | 93  | 99  | 45  | 14  | 10  | 57  | 68  | 98  | 97  |
|                   | $\sigma_{\text{abs}}$ | 99  | 96  | 100 | 92  | 99  | 44  | 13  | 10  | 55  | 67  | 97  | 98  |
| <b>2009</b>       | $\sigma_{\text{sca}}$ | 100 | 100 | 100 | 100 | 34  | 0   | 0   | 15  | 33  | 83  | 97  | 93  |
|                   | $\sigma_{\text{abs}}$ | 97  | 99  | 100 | 100 | 38  | 0   | 0   | 14  | 32  | 85  | 98  | 89  |
| <b>2010</b>       | $\sigma_{\text{sca}}$ | 100 | 97  | 28  | 0   | 0   | 76  | 93  | 92  | 100 | 15  | 0   | 56  |
|                   | $\sigma_{\text{abs}}$ | 86  | 80  | 28  | 0   | 0   | 77  | 92  | 90  | 100 | 15  | 0   | 57  |
| <b>2011</b>       | $\sigma_{\text{sca}}$ | 96  | 98  | 87  | 79  | 84  | 90  | 31  | 85  | 100 | 84  | 100 | 97  |
|                   | $\sigma_{\text{abs}}$ | 76  | 0   | 74  | 100 | 98  | 100 | 63  | 100 | 100 | 85  | 100 | 92  |
| <b>2012</b>       | $\sigma_{\text{sca}}$ | 98  | 99  | 99  | 100 | 100 | 97  | 98  | 100 | 98  | 100 | 100 | 93  |
|                   | $\sigma_{\text{abs}}$ | 98  | 100 | 99  | 100 | 82  | 28  | 0   | 0   | 0   | 0   | 0   | 0   |
| <b>2013</b>       | $\sigma_{\text{sca}}$ | 97  | 51  | 79  | 100 | 100 | 100 | 100 | 100 | 100 | 100 | 100 | 96  |
|                   | $\sigma_{\text{abs}}$ | 0   | 0   | 79  | 100 | 100 | 100 | 100 | 100 | 99  | 99  | 99  | 89  |
| <b>2014</b>       | $\sigma_{\text{sca}}$ | 77  | 92  | 98  | 100 | 100 | 100 | 100 | 100 | 100 | 100 | 100 | 97  |
|                   | $\sigma_{\text{abs}}$ | 70  | 91  | 98  | 100 | 100 | 99  | 100 | 100 | 100 | 99  | 100 | 0   |
| <b>2015</b>       | $\sigma_{\text{sca}}$ | 100 | 100 | 100 | 100 | 100 | 100 | 100 | 100 | 100 | 99  | 41  | 69  |
|                   | $\sigma_{\text{abs}}$ | 0   | 0   | 0   | 0   | 89  | 95  | 100 | 99  | 100 | 91  | 43  | 69  |
| <b>2016</b>       | $\sigma_{\text{sca}}$ | 100 | 100 | 100 | 100 | 100 | 100 | 100 | 84  | 100 | 100 | 100 | 97  |
|                   | $\sigma_{\text{abs}}$ | 94  | 100 | 100 | 99  | 99  | 100 | 100 | 87  | 99  | 100 | 100 | 100 |
| <b>2017</b>       | $\sigma_{\text{sca}}$ | 100 | 100 | 100 | 92  | 100 | 100 | 100 | 98  | 100 | 100 | 100 | 38  |
|                   | $\sigma_{\text{abs}}$ | 100 | 100 | 99  | 65  | 95  | 99  | 99  | 96  | 100 | 100 | 81  | 14  |

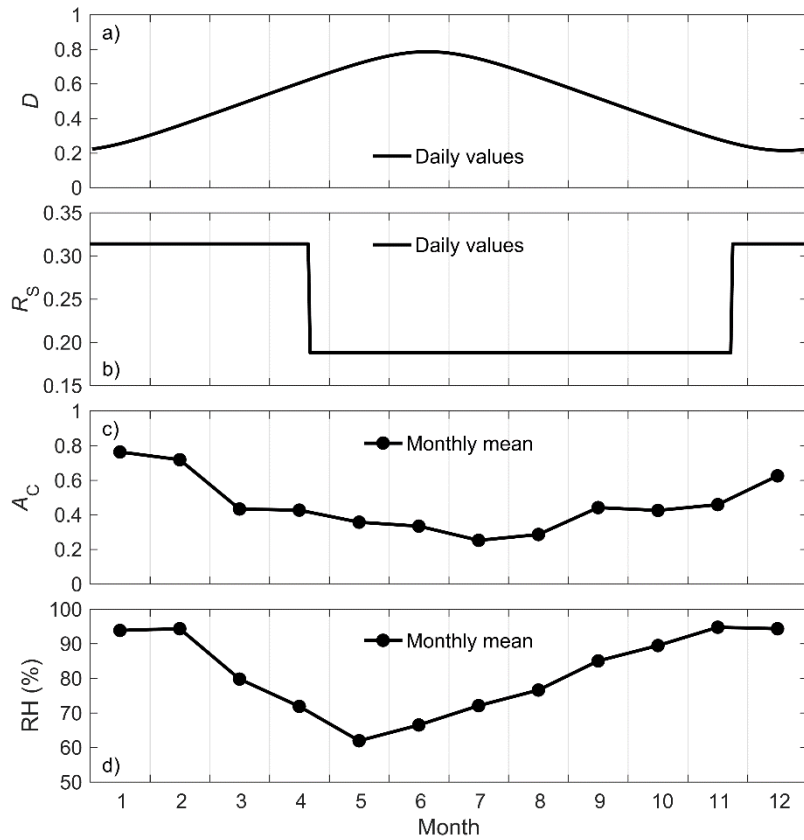

**Figure S1: Seasonality of a) the fractional day length ( $D$ ), b) the surface reflectance ( $R_s$ ), c) the cloud fraction ( $A_C$ ), and d) the relative humidity (RH). In calculating the RFEs and RFE<sub>S,moist</sub>, we used daily values for  $D$  and  $R_s$ , and monthly means for  $A_C$  and RH.**

## 5 S2. Seasonal environmental variables for calculating the RFE

The seasonal variability of the environmental parameters ( $D$ ,  $R_s$ ,  $A_C$ , and RH) used in calculating the seasonal radiative effective forcing (RFE<sub>S</sub> and RFE<sub>S,moist</sub>) are presented in Fig. S1. The fractional daylength ( $D$ ) was calculated for the latitude of 61°N and the seasonal variation of  $D$  is presented in Fig. S1a. The surface reflectance ( $R_s$ ) was determined by using the surface reflectance measurements by Kuusinen et al., (2012) and the seasonal variation of  $R_s$  is presented in Fig. S1b. The cloud fraction was measured ( $A_C$ ) by a ceilometer that was deployed to a nearby airport that is located about 25 km from SMEAR II. The monthly means were calculated by using data from 2010 to 2017 and the seasonal variation is presented in Fig. S1c. The relative humidity (RH) measurements were conducted with a RH sensor (Rotronic model MP102H) at 16 m height at SMEAR II. We used measurements from 2012 to 2017 in calculating the monthly means that are presented in Fig. S1d. For the  $D$  and  $R_s$  we used daily values and for the  $A_C$  and RH the monthly means were used in calculating the RFE

## S2. Aethalometer data processing

### S2.1 Flow correction

The flow reported by the Aethalometer was corrected by using the weekly flow measurements conducted at SMEAR II with a Gilian flow meter. For correcting the flow we used a three-month moving average of the measured flow. The corrected flow is presented in Fig. S2.

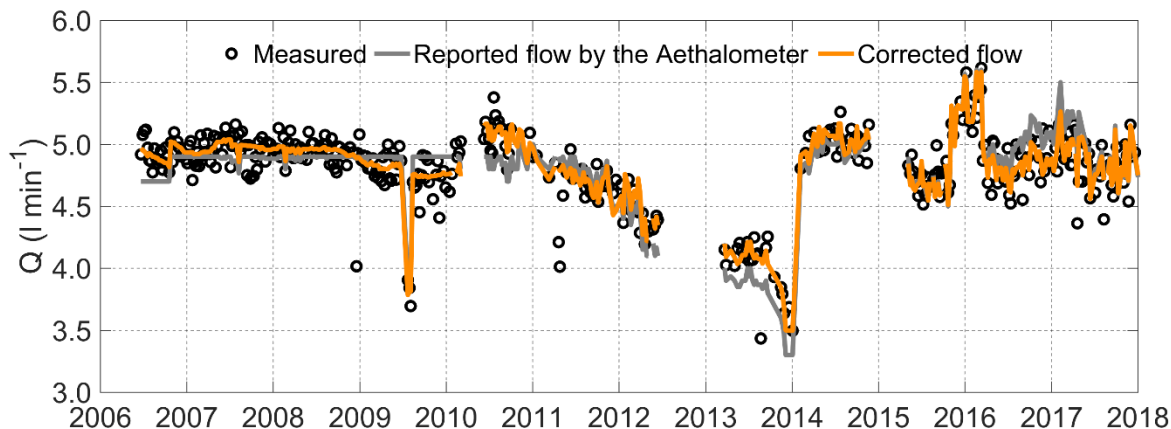

**Figure S2: The Aethalometer flow ( $Q$ ) correction. The black circles represent the flow measurements that were conducted almost every week at SMEAR II. The gray line is the flow that was reported by the Aethalometer and the orange line represents the corrected flow that was used in the data analysis.**

10

### S2.2 Difference between correction algorithms

In Table S2, we present values for PM<sub>10</sub> AOPs that depend on the  $\sigma_{\text{abs}}$ . In Table S2, the absorption data was corrected with the correction algorithm that was suggested by Arnott et al., (2005) with a  $C_{\text{ref}} = 3.688$  at  $\lambda = 520$  nm in a similar manner to Virkkula et al. (2011). However, the results may vary from Virkkula et al., (2011), since we used a spot size correction and a flow correction.

By comparing Table S2 to the Table 1 in the main article, we see that there is no large difference between the measured  $\sigma_{\text{abs}}$  at 520 nm. Since the  $\sigma_{\text{abs}}$  is rather similar, there is no notable difference in  $\omega_0$  either. There is a larger difference, however, in  $\sigma_{\text{abs}}$  at other wavelengths. This causes the  $\alpha_{\text{abs}}$  to be remarkably higher than the  $\alpha_{\text{abs}}$  that was determined for data, which was corrected with the algorithm described in the main article. We also did the trend analysis for the data corrected with the algorithm by Arnott et al., (2005). The slope of the  $\sigma_{\text{abs}}$  statistically significant trend was  $-0.085 \text{ Mm}^{-1}\text{yr}^{-1}$  ( $-6 \text{ \%yr}^{-1}$ ), which was similar to the trend determined with the new algorithm by Collaud Coen et al., (2010).

20

Table S2. PM10 AOPs derived from Aethalometer data that was corrected with the algorithm described by Arnott et al. (2005).

| PM10                                              | $\lambda$ (nm) | mean $\pm$ SD   | 1 %  | 10 % | 25 % | 50 % | 75 % | 90 % | 99 % |
|---------------------------------------------------|----------------|-----------------|------|------|------|------|------|------|------|
| $\sigma_{\text{abs}}$ ( $\text{Mm}^{-1}$ )        | 370            | $3.3 \pm 3.9$   | 0.2  | 0.6  | 1.1  | 2.1  | 4.1  | 7.3  | 19.4 |
|                                                   | 520            | $2.1 \pm 2.4$   | 0.1  | 0.4  | 0.7  | 1.4  | 2.6  | 4.7  | 12.0 |
|                                                   | 950            | $1.0 \pm 1.1$   | -0.1 | 0.1  | 0.3  | 0.6  | 1.2  | 2.2  | 5.3  |
| $\omega_0$                                        | 450            | $0.88 \pm 0.08$ | 0.63 | 0.79 | 0.84 | 0.89 | 0.93 | 0.95 | 0.99 |
|                                                   | 550            | $0.87 \pm 0.09$ | 0.62 | 0.78 | 0.84 | 0.89 | 0.92 | 0.95 | 0.99 |
|                                                   | 700            | $0.85 \pm 0.09$ | 0.56 | 0.75 | 0.81 | 0.87 | 0.91 | 0.95 | 0.99 |
| $\alpha_{\text{abs}}$                             | 370/520        | $1.30 \pm 0.60$ | 0.16 | 0.85 | 1.10 | 1.30 | 1.46 | 1.68 | 2.86 |
|                                                   | 370/950        | $1.36 \pm 0.51$ | 0.28 | 0.92 | 1.16 | 1.34 | 1.49 | 1.71 | 3.31 |
|                                                   | 470/950        | $1.43 \pm 0.63$ | 0.12 | 0.98 | 1.23 | 1.40 | 1.55 | 1.81 | 3.86 |
| <b>RFE<sub>H&amp;S</sub></b> ( $\text{Wm}^{-2}$ ) | 550            | $-22 \pm 8$     | -33  | -29  | -27  | -23  | -19  | -15  | -3   |

### S3. Uncertainty analysis

We determined the uncertainties for the intensive PM10 AOPs using the equations presented in the supplementary material by Sherman et al. (2015). The absolute and fractional uncertainties are presented in Table S4. Here we used fractional uncertainties of 9.2 %, 8.0 %, and 23 % for the PM10  $\sigma_{\text{sca}}$ ,  $\sigma_{\text{bsca}}$ , and  $\sigma_{\text{abs}}$ , respectively. Since the uncertainties depend on the measured values, we used the mean values presented in Table 1 of the main article.

Table S3: Uncertainties for different intensive AOPs. Fractional uncertainty is the absolute uncertainty divided by the mean value of the AOP. The uncertainties for  $\omega_0$ ,  $b$ , and RFE<sub>H&S</sub> were determined at 550 nm. The uncertainty for  $\alpha_{\text{sca}}$  was determined for the wavelength range 450–700 nm, and the uncertainty for the  $\alpha_{\text{abs}}$  was determined for the wavelength range 370–950 nm.

|                                                          | Absolute uncertainty | Fractional uncertainty (%) |
|----------------------------------------------------------|----------------------|----------------------------|
| $\Delta\omega_0$                                         | 0.018                | 2.1                        |
| $\Delta b$                                               | 0.003                | 2.2                        |
| $\Delta\alpha_{\text{sca}}$                              | 0.044                | 2.5                        |
| $\Delta\alpha_{\text{abs}}$                              | 0.26                 | 27.7                       |
| $\Delta\text{RFE}_{\text{H\&S}}$<br>( $\text{Wm}^{-2}$ ) | 1.42                 | 6.5                        |

### S4. Seasonality of the trends

Fig. S3 presents the time series of the  $\sigma_{\text{sca}}$ ,  $\sigma_{\text{abs}}$ ,  $V_{\text{tot}}$ , and  $V_{\text{fine}}$  monthly medians separately for spring, summer, autumn, and winter. Fig. S3 reveals the the year-to-year variability between different seasons and it seems that in winter the variation from the fitted trend line is the highest. This is probably due to changes in the meteorological conditions. For example, according to

the statistics provided by the FMI (FMI: <http://ilmatieteenlaitos.fi/vuositilastot>, in Finnish only, last access: 25 March 2019) winter 2008 (December 2007 – February 2008) was exceptionally warm and the air masses arriving to Finland were mostly from the South and South-West that explains the low concentrations. On the contrary, high concentrations were measured in winter 2010, which was according to the reports by the FMI notably colder than average. It also seems from Figs. S3c, h, and g that the concentration in winter increased from 2006 to 2010 after which it started to decrease. For other seasons we do not observe this kind of variation.

We did a similar analysis for the seasonal trends of  $V_{\text{tot}}$  and  $V_{\text{fine}}$  as we did for the  $\sigma_{\text{sca}}$  and  $\sigma_{\text{abs}}$  in the main article. The results are presented in Table S3. For  $V_{\text{tot}}$  we observed a significant decreasing trend for all seasons and for  $V_{\text{fine}}$  we observed significant trends for spring, summer, and winter. For the  $V_{\text{tot}}$  the relative trends were rather similar for all the seasons; the relative trends of  $V_{\text{fine}}$  had more variation between the seasons. The variation of  $V_{\text{fine}}$  relative trends was similar to that of the  $\sigma_{\text{sca}}$  and  $\sigma_{\text{abs}}$ ; the trends were most negative in winter and spring, and least negative in summer. This analysis would suggest that the variation of the  $\sigma_{\text{sca}}$  and  $\sigma_{\text{abs}}$  seasonal trends was due to varying trends in fine particle concentration.

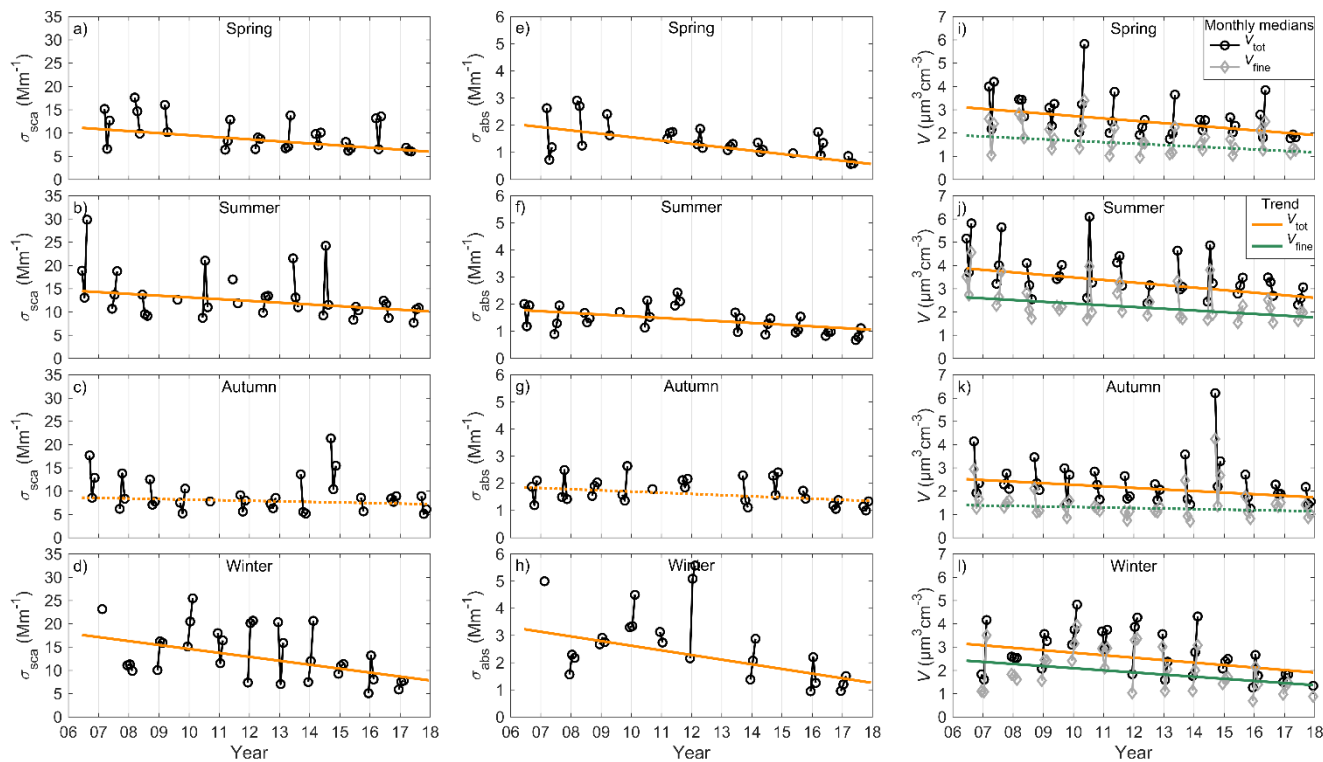

15 **Figure S3: Monthly median values of a) – d)  $\sigma_{\text{sca}}$ , e) – h)  $\sigma_{\text{abs}}$ , and i) – l)  $V_{\text{tot}}$  (black) and  $V_{\text{fine}}$  (gray), and their trends. If the trend was statistically significant, the line is uniform and if the  $p$  value of the trend was  $> 0.05$ , the line is dashed.**

**Table S4: The seasonal trend for  $V_{tot}$  and  $V_{fine}$ .**

|               | Trend               |      | Lower               | Upper               | $p$ -value | Trend               |      | Lower               | Upper               | $p$ -value |
|---------------|---------------------|------|---------------------|---------------------|------------|---------------------|------|---------------------|---------------------|------------|
|               | (yr <sup>-1</sup> ) |      | (yr <sup>-1</sup> ) | (yr <sup>-1</sup> ) |            | (yr <sup>-1</sup> ) |      | (yr <sup>-1</sup> ) | (yr <sup>-1</sup> ) |            |
| <b>Spring</b> | -0.10               | -4 % | -0.20               | -0.04               | < 0.01     | -0.06               | -4 % | -0.15               | 0.00                | 0.07       |
| <b>Summer</b> | -0.11               | -3 % | -0.20               | -0.03               | < 0.01     | -0.07               | -3 % | -0.14               | -0.02               | < 0.01     |
| <b>Autumn</b> | -0.07               | -3 % | -0.11               | -0.02               | < 0.01     | -0.02               | -2 % | -0.07               | 0.01                | 0.23       |
| <b>Winter</b> | -0.11               | -4 % | -0.21               | -0.01               | < 0.05     | -0.09               | -5 % | -0.18               | -0.00               | < 0.05     |

### S5. The trend of size distribution

The trend for the size distribution was determined by applying the seasonal Kendall test to each channel of the TDMPS and 5 APS. The results are shown in Fig. S4 that presents statistically significant decreasing trends for most of the measurement channels. The relative trend was the most negative (about -5 % yr<sup>-1</sup>) for particles that were about 500 – 800 nm in diameter. Fig. S6 shows that the particle volume size distribution typically has a peak around 200 – 400 nm so the largest decrease occurs on the larger side of the accumulation mode.

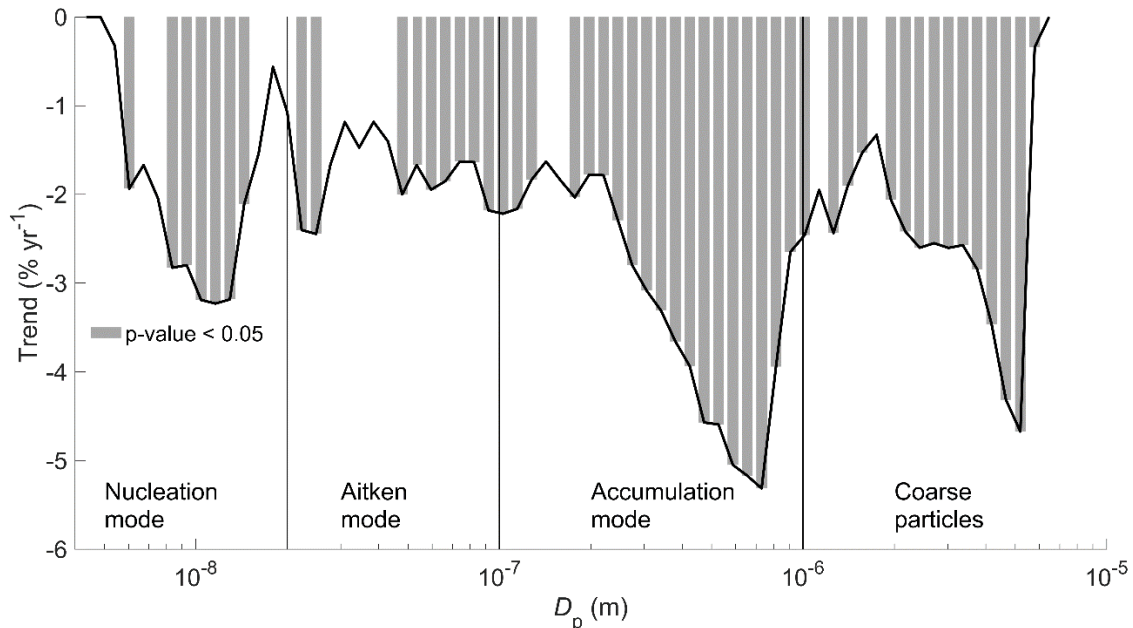

10 **Figure S4: Trend analysis for the size distribution. The solid line represents the average trend in percentages. The gray bars mark the size ranges, in which the trend was statistically significant ( $p$ -value < 0.05). The typical borders of the nucleation, Aitken, accumulation and coarse particle modes are marked with vertical lines.**

## S6. Scattering Ångström exponent in simulated bimodal size distributions

Two sets of simulations were done so that in the first one the geometric standard deviations (GSD) of both modes were 1.5 and the number concentrations (N) of the small and large particle modes were  $N_{\text{small}} = 1000 \text{ cm}^{-3}$  and  $N_{\text{large}} = 10 \text{ cm}^{-3}$ , respectively. The small particle mode  $\text{GMD}_{\text{small}}$  varied from 50 to 300 nm, the large particle mode was set constant to  $\text{GMD}_{\text{large}} = 300 \text{ nm}$ . In the second set we changed both the number concentrations and the widths of the modes:  $N_{\text{small}} = 1000 \text{ cm}^{-3}$  and  $N_{\text{large}} = 1 \text{ cm}^{-3}$ , and  $\text{GSD}_{\text{small}} = 1.3$  and  $\text{GSD}_{\text{large}} = 2.0$ . We used the Mie code and the refractive index  $m = 1.517 + 0.019i$  and calculated  $\sigma_{\text{sca}}$  at  $\lambda = 450 \text{ nm}$ ,  $550 \text{ nm}$  and  $700 \text{ nm}$  and  $\alpha_{\text{sca}}$  for both the full bimodal size distribution as a function of its GMD, and for the two modes separately as a function of the GMD of the modes. In addition, we calculated the mode-scattering-weighted average  $\alpha_{\text{sca}}$  from

$$10 \quad \alpha_{\text{sca,swa}} = \frac{\sum \sigma_{\text{sca}550,i} \alpha_{\text{sca},i}}{\sigma_{\text{sca}550}} = \frac{\sigma_{\text{sca}550,\text{small}} \alpha_{\text{sca},\text{small}} + \sigma_{\text{sca}550,\text{large}} \alpha_{\text{sca},\text{large}}}{\sigma_{\text{sca}550}} \quad (\text{S1})$$

where  $\sigma_{\text{sca}550,\text{small}}$ ,  $\sigma_{\text{sca}550,\text{large}}$  and  $\sigma_{\text{sca}550}$  are the scattering coefficients of the small particle mode, the large particle mode and the full size distribution, respectively at 550 nm and  $\alpha_{\text{sca},\text{small}}$  and  $\alpha_{\text{sca},\text{large}}$  the scattering Ångström exponents of the two modes. The results are shown in Fig S3. In both simulations  $\alpha_{\text{sca}}$  first increases with growing GMD, reaches a maximum at  $\text{GMD} \approx 130 \text{ nm} - 150 \text{ nm}$  and then starts decreasing. The small particle mode  $\alpha_{\text{sca},\text{small}}$  has values close to 4 for small GMDs and then it decreases as a function of increasing GMD in line with the expected relationship. The  $\alpha_{\text{sca,swa}}$  follows very closely the  $\alpha_{\text{sca}}$  which suggests that the latter can be calculated as a linear combination of scattering-weighted  $\alpha_{\text{sca}}$  of modes. This also explains the increase of  $\alpha_{\text{sca}}$  with growing GMD: for the smallest GMDs of the small particle mode the  $\alpha_{\text{sca},\text{small}}$  is high but since the fraction of  $\sigma_{\text{sca}550,\text{small}}$  of total  $\sigma_{\text{sca}550}$  is small, the contribution of  $\alpha_{\text{sca},\text{small}}$  is small.

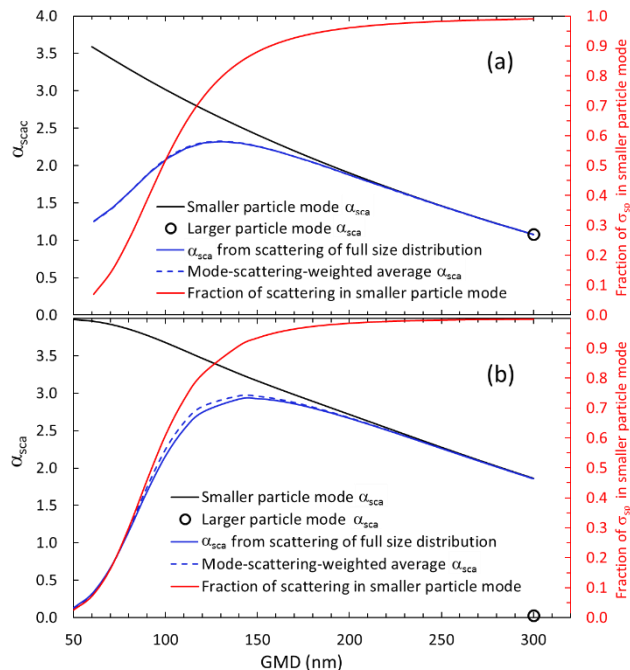

5 **Figure S5: Simulated scattering Ångström exponent of bimodal size distributions as a function of the geometric mean diameter (GMD). The geometric standard deviations (GSD) and number concentrations of the modes were a) small particle mode: GSD = 1.5, N = 1000; large particle mode: GSD = 1.5, N = 10, b) small particle mode: GSD = 1.3, N = 1000; large particle mode: GSD = 2, N = 1. The small particle mode GMD varied from 50 to 300 nm, the large particle mode GMD = 300 nm.**

### S7. The seasonal variation of the size distribution

Fig. S6 presents the mean aerosol particle volume size distribution, and the median  $\alpha_{sca}$  and  $b$  for different seasons. Fig. S7 presents the seasonal variation of the geometrical mean diameter (GMD), the volumetric mean diameter for fine particles ( $D_p < 1 \mu\text{m}$ ,  $VMD_{\text{fine}}$ ) and the volumetric mean diameter for all particles ( $D_p < 10 \mu\text{m}$ ,  $VMD_{\text{tot}}$ ). The seasonal variation of the size distribution helps interpreting the seasonal variation of  $\alpha_{sca}$  and  $b$  that are sensitive to different size ranges.

10



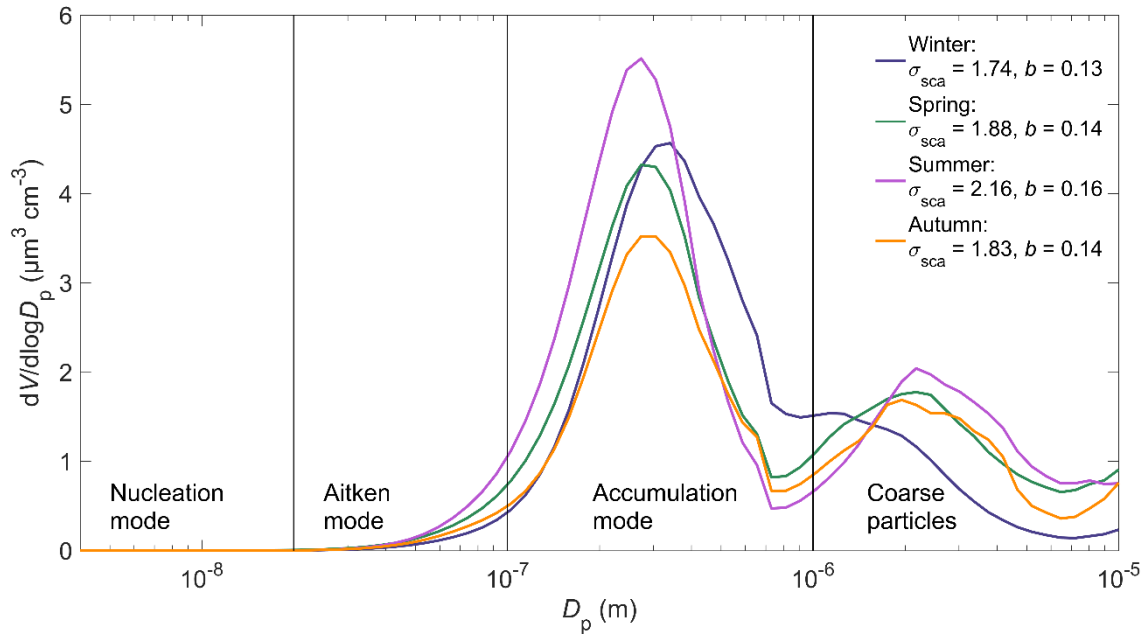

Figure S6: Averaged volume size distribution for winter (December – February), spring (March – May), summer (June – August) and autumn (September – November). Also, the averaged  $\alpha_{\text{sca}}$  and  $b$  for the seasons are presented.

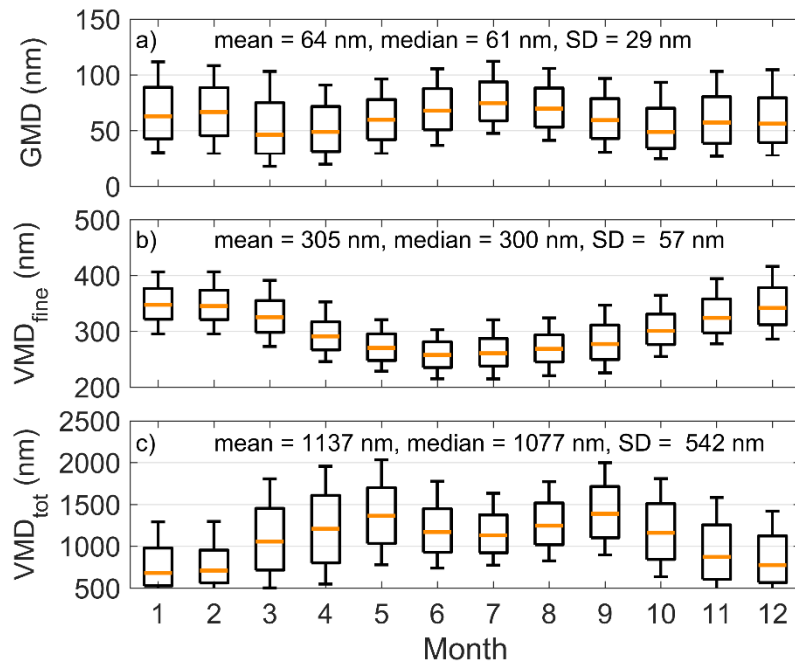

5 Figure S7: The seasonal variation and statistics for a) the GMD, b) the  $\text{VMD}_{\text{fine}}$ , and c)  $\text{VMD}_{\text{tot}}$ .

## S8. Diurnal variation of AOPs

The diurnal variations of AOPs at SMEAR II were also studied, as shown in Fig. S8. However, the diurnal variations were weak and not nearly as clear as the seasonal variation. This was expected, since SMEAR II is located in a rather remote area further away from anthropogenic activities. Since the meteorological conditions at the SMEAR II station vary widely from season to season, the daily variation was determined separately for spring (March–May), summer (June–August), autumn (September–November) and winter (December–February). The diurnal variation was similar to the PM1 particles, so we do not present that separately.

For the extensive properties, the daily variation was similar in spring and summer, when both the  $\sigma_{\text{sca}}$  and  $\sigma_{\text{abs}}$  experienced a decrease during the day. The plausible explanation is boundary layer mixing that dilutes the air. The diurnal variation in both the  $\sigma_{\text{sca}}$  and  $\sigma_{\text{abs}}$  was smallest in autumn. In winter, the  $\sigma_{\text{sca}}$  was maximal before noon but it did not decrease significantly in the afternoon that is clearly different from the diurnal cycles of the  $\sigma_{\text{sca}}$  in spring and summer. In winter, the variation was much weaker, which can be explained by the weaker solar radiation and consequently weaker boundary layer mixing. In winter, there were also more often temperature inversions that caused air pollutants to accumulate in the boundary layer. The maximum  $\sigma_{\text{abs}}$  in winter was observed in the evening at about 18–20 local time, whereas the maximum  $\sigma_{\text{sca}}$  was before noon. In winter, the extensive properties increase slightly during the day and decrease during the late night and early morning hours. The daily variation in the  $\omega_0$  is contrasted with the variation in  $\sigma_{\text{abs}}$  in every season. In spring, summer, and autumn  $\omega_0$  was the highest during the day, while in winter it peaked in the early morning.

The clearest diurnal variation was seen for  $\sigma_{\text{abs}}$ , which had an effect on  $\omega_0$  and  $k$  that can be observed in Fig. S6. For  $n$  the diurnal variation is barely visible, but it is the opposite to  $k$ . For the size depended properties  $b$  and  $\alpha_{\text{sca}}$ , there is no daily variation whatsoever. For the  $\alpha_{\text{abs}}$ , there is no variation during the winter, but during other seasons, the  $\alpha_{\text{abs}}$  experiences a small decrease during the daytime. The variation of the  $\alpha_{\text{abs}}$  is strongest during the summer and during the other seasons the variation is rather small. In the summer, there is more organic material present that can condensate on BC particles and thus cause variation in the  $\alpha_{\text{abs}}$ .

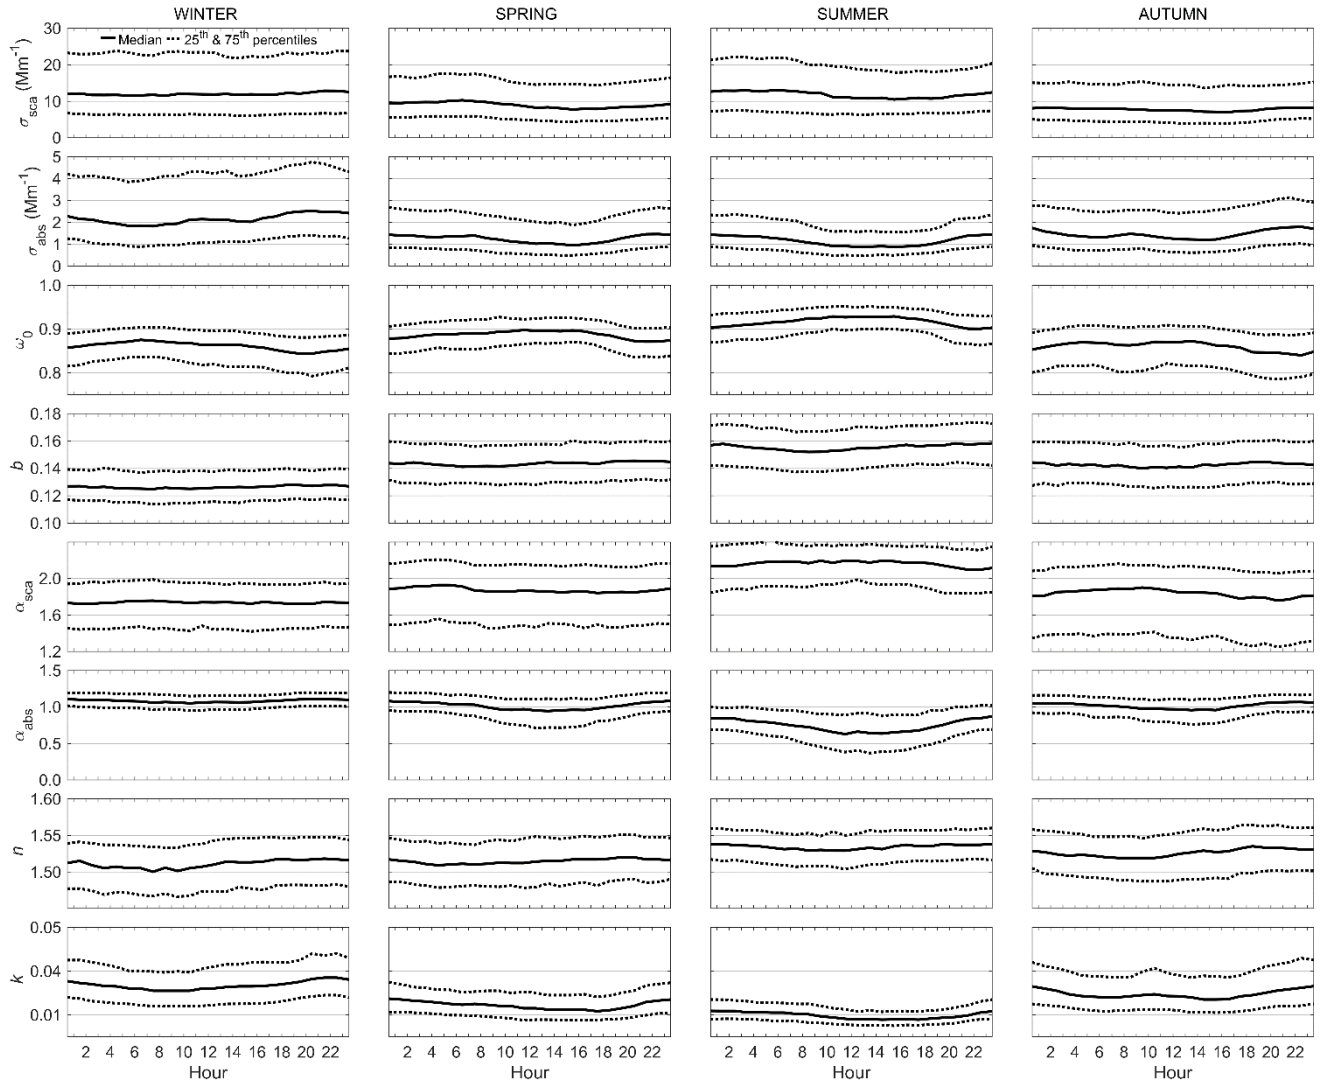

**Figure S8: Diurnal variation of different optical properties for different seasons for PM10 particles. The solid black line represents the median value and the dashed lines are the 25<sup>th</sup> and 75<sup>th</sup> percentiles.**

### S9. Radiative forcing efficiency

- 5 The relationship between the  $RFE_{H\&S}$ ,  $\omega_0$  and  $b$  is shown in Fig. S9. It can be seen that the correlation with  $\omega_0$  is much stronger than with  $b$ . This can be interpreted such that at SMEAR II, the  $RFE_{H\&S}$  for dry particles was much more dependent on the chemical composition described by the  $\omega_0$  and not as much on the size distribution described by  $b$ . This situation looks probably different if the ambient RH was taken into account. In the main results we saw that the  $RFE_{S,moist}$  was less negative than  $RFE_S$ . So in the moist condition the variability in  $b$  overcame the variability of  $\omega_0$ .

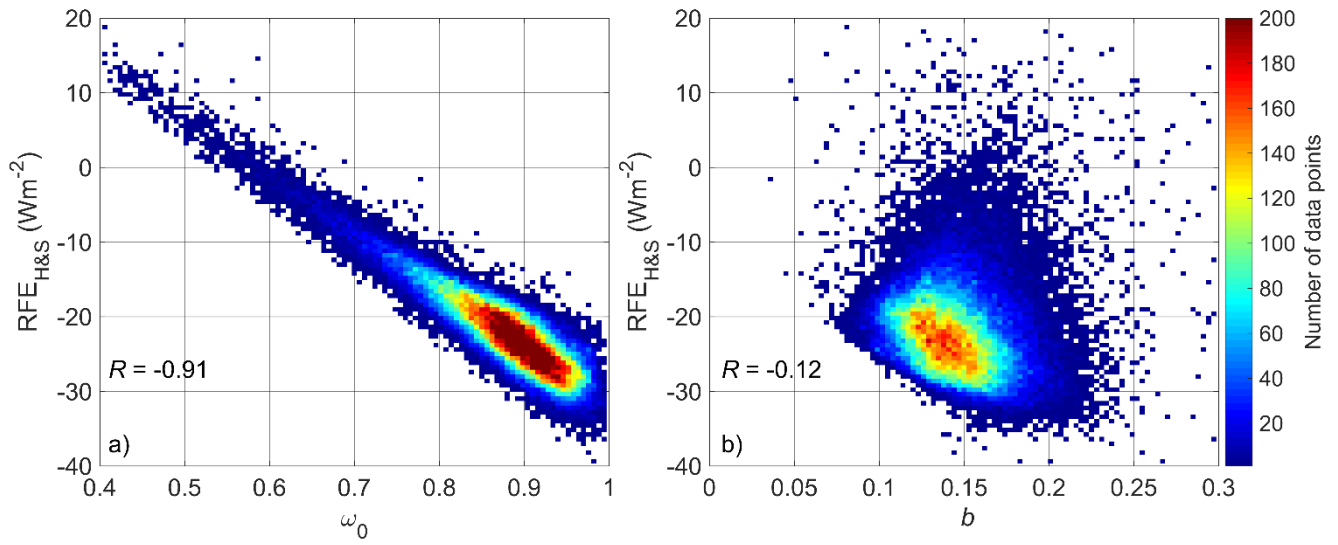

5 **Figure S9:  $RFE_{H\&S}$  as a function of a) single-scattering albedo ( $\omega_0$ ) and b) backscatter fraction ( $b$ ) at  $\lambda = 550$  nm. The coloring indicates the concentration of the data points in a single grid point. In each figures, there are 100 grid points on both axes, making 10 000 grid points in total.**
